# Supplementary material
Source: PubMed Central journal article supplement (PMC10602048)
Supplement: NIHMS1937464-supplement-2.pdf [file NIHMS1937464-supplement-2.pdf]

## ■ ASSOCIATED CONTENT

### SI Supporting Information

The Supporting Information is available free of charge at <https://pubs.acs.org/doi/10.1021/jacs.3c03639>.

Additional experimental details, materials, computational details, parameters used in modeling, and associated methods ([PDF](#))
